# Supplementary material for: Photo/thermoresponsive ABC triblock copolymer-based ion gels: photoinduced structural transitions
Source: Royal Society of Chemistry journal article supplement (doi:10.1039/c8sm01578c), 2018-01-01
Supplement: c8sm01578c1.pdf [file c8sm01578c1.pdf]

## **Electronic Supplementary Information (ESI)**

### **Photo/thermoreponsive ABC triblock copolymer-based ion gels:**

#### **Photoinduced structural transitions**

Ryota Tamate, Ryoji Usui, Kei Hashimoto, Yuzo Kitazawa, Hisashi Kokubo and Masayoshi Watanabe\*

Department of Chemistry and Biotechnology, Yokohama National University, 79-5 Tokiwadai, Hodogaya-ku, Yokohama 240-8501, Japan.

\*To whom correspondence should be addressed. E-mail: [mwatanab@ynu.ac.jp](mailto:mwatanab@ynu.ac.jp). Phone/Fax: +81-45-339-3955

### **Calculation procedure of the theoretical elasticity $G$ for ABA and ABC ion gels**

The theoretical elasticity,  $G$ , from classical rubber elasticity theory is expressed as

$$G = nk_{\text{B}}T = \rho RT/M_{\text{x}} \quad (1)$$

where  $n$  is the number density of network strands,  $\rho$  the mass density of the strand,  $M_{\text{x}}$  the molecular weight between crosslinks,  $T$  the absolute temperature,  $k_{\text{B}}$  the Boltzmann constant, and  $R$  the gas constant. Here,  $M_{\text{x}}$  corresponds to the molecular weight of the B middle block (present ABC: 67 kg/mol, previous ABA<sup>S1</sup>: 33 kg/mol). The mass density of the strand could be calculated as

$$\rho = c\rho_{\text{gel}}w_{\text{B}} \quad (2)$$

where  $c$  is the polymer concentration (w/w) (ABC: 0.15, ABA: 0.20),  $\rho_{\text{gel}}$  the mass density of the ion gel (ABC: 1.52 g cm<sup>-3</sup>, ABA: 1.37 g cm<sup>-3</sup>),  $w_{\text{B}}$  the weight ratio of the B middle block in the triblock copolymer (ABC: 0.68; ABA<sup>S1</sup>: 0.52). Here, we hypothesize that the mass densities of the ion gels are equal to those of the IL solvents ([C<sub>2</sub>mim][NTf<sub>2</sub>] for ABC, [C<sub>4</sub>mim]PF<sub>6</sub> for ABA). The mass densities of the strand ( $\rho$ ) for ABC and ABA ion gels were calculated by substituting these values into Eq. (2) (ABC: 155 kg m<sup>-3</sup>, ABA: 144 kg m<sup>-3</sup>). Finally, by using these values, theoretical elasticity  $G$  can be calculated at 25 °C ( $T = 298.15$  K) from Eq. (1) (ABC: 5.71 kPa, ABA: 10.8 kPa).

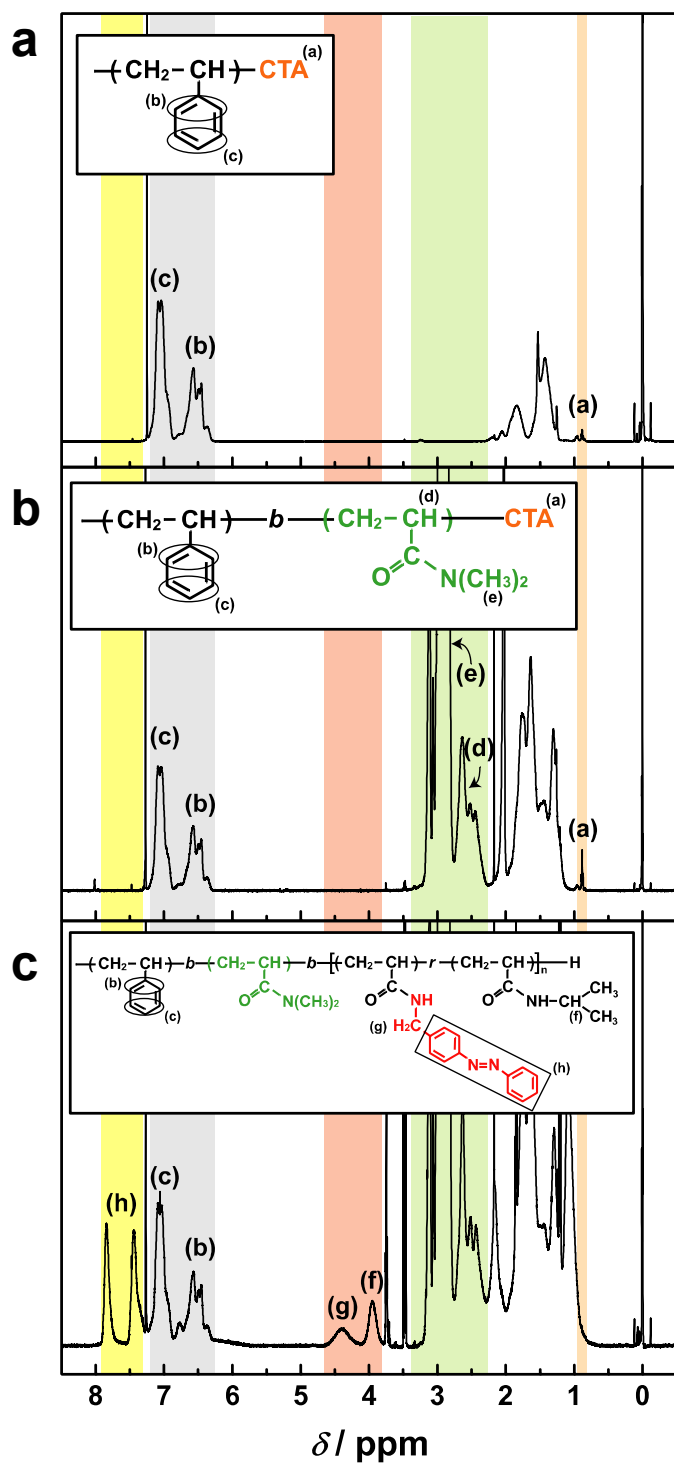

**Fig. S1**  $^1\text{H-NMR}$  spectra of (a) PS-CTA, (b) PS-*b*-PDMAm-CTA (AB-CTA), and (c) PS-*b*-PDMAm-*b*-P(AzoBnAm-*r*-NIPAm) (ABC(Azo)) in  $\text{CDCl}_3$ .

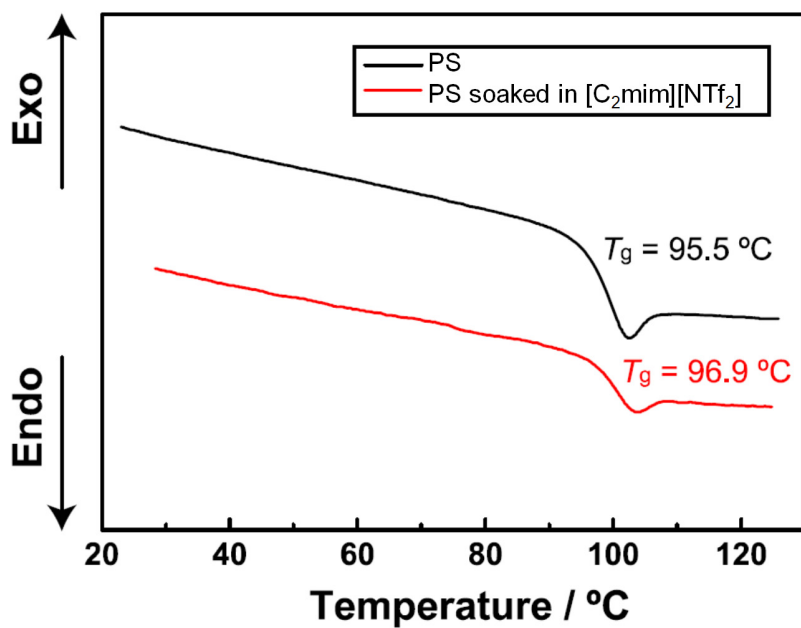

**Fig. S2** DSC curves of bulk PS homopolymer and PS homopolymer soaked in [C<sub>2</sub>mim][NTf<sub>2</sub>] at heating rate 10 °C min<sup>-1</sup>. Nearly identical glass transition temperatures ( $T_g$ ) indicate that the  $T_g$  of PS is not affected by the presence of IL, which is consistent with our previous result.<sup>S2</sup>

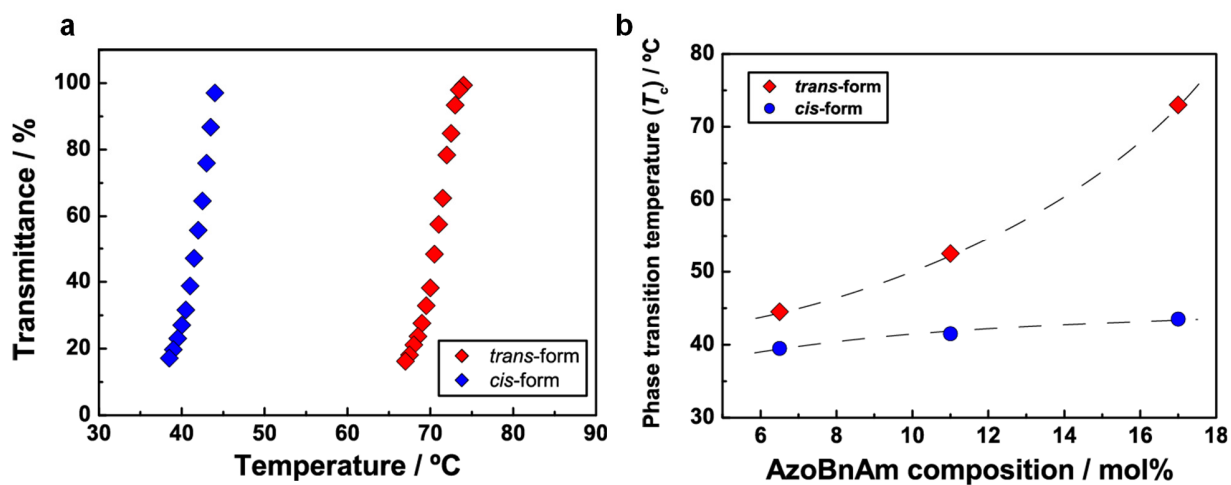

**Fig. S3** (a) Temperature dependence of optical transmittance at 500 nm for 3 wt% P(AzoBnAm-*r*-NIPAm) random copolymer in [C<sub>2</sub>mim][NTf<sub>2</sub>] in the dark (*trans*-form) and under UV light irradiation (*cis*-form). [AzoBnAm]/[NIPAm] = 17/83. (b) Effect of the AzoBnAm composition in P(AzoBnAm-*r*-NIPAm) on UCST type phase transition temperatures for 3 wt% P(AzoBnAm-*r*-NIPAm) solutions in [C<sub>2</sub>mim][NTf<sub>2</sub>].

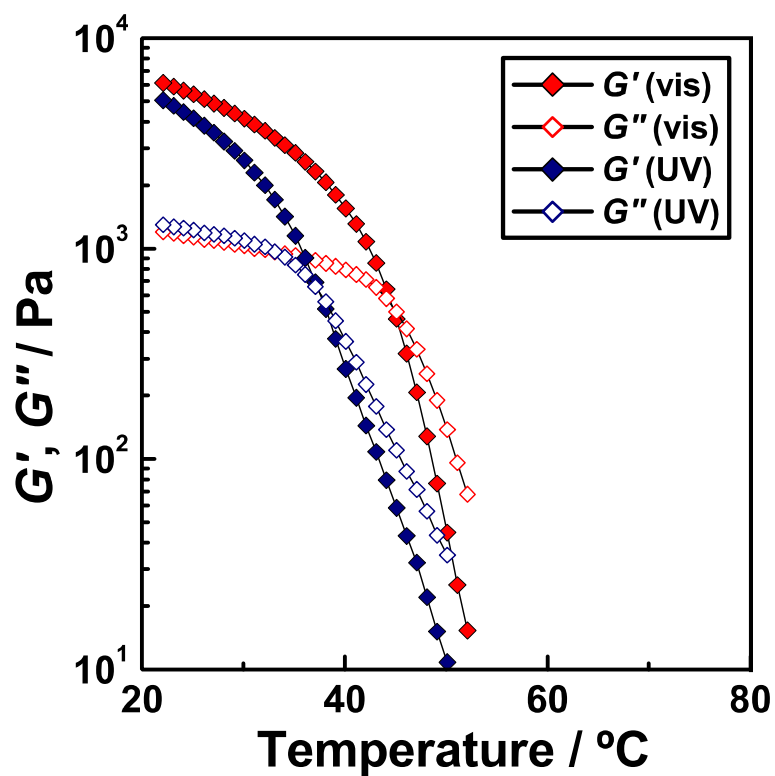

**Fig. S4** Variations in  $G'$  and  $G''$  values for 20 wt% ABA triblock copolymer P(AzoMA-*r*-NIPAm)-*b*-PEO-*b*-P(AzoMA-*r*-NIPAm) in [C<sub>2</sub>mim][NTf<sub>2</sub>] under UV and visible light irradiations as functions of temperature at frequency  $\omega = 0.1 \text{ rad s}^{-1}$ , strain amplitude  $\gamma = 1 \%$ , and cooling rate  $0.2 \text{ }^\circ\text{C min}^{-1}$ .

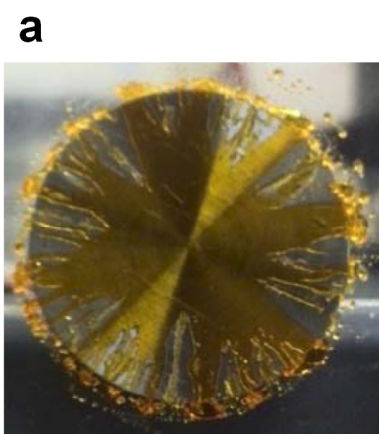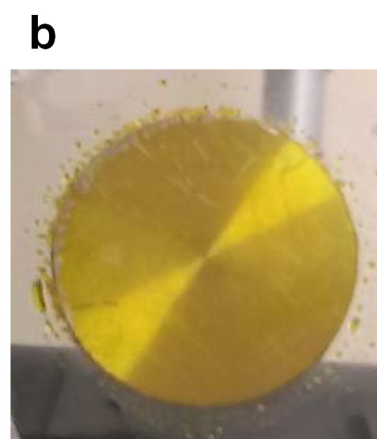

**Fig. S5** (a, b) Appearances of 15 wt% ABC(Azo) ion gel after strain sweep measurements under visible light (a) and UV light (b).

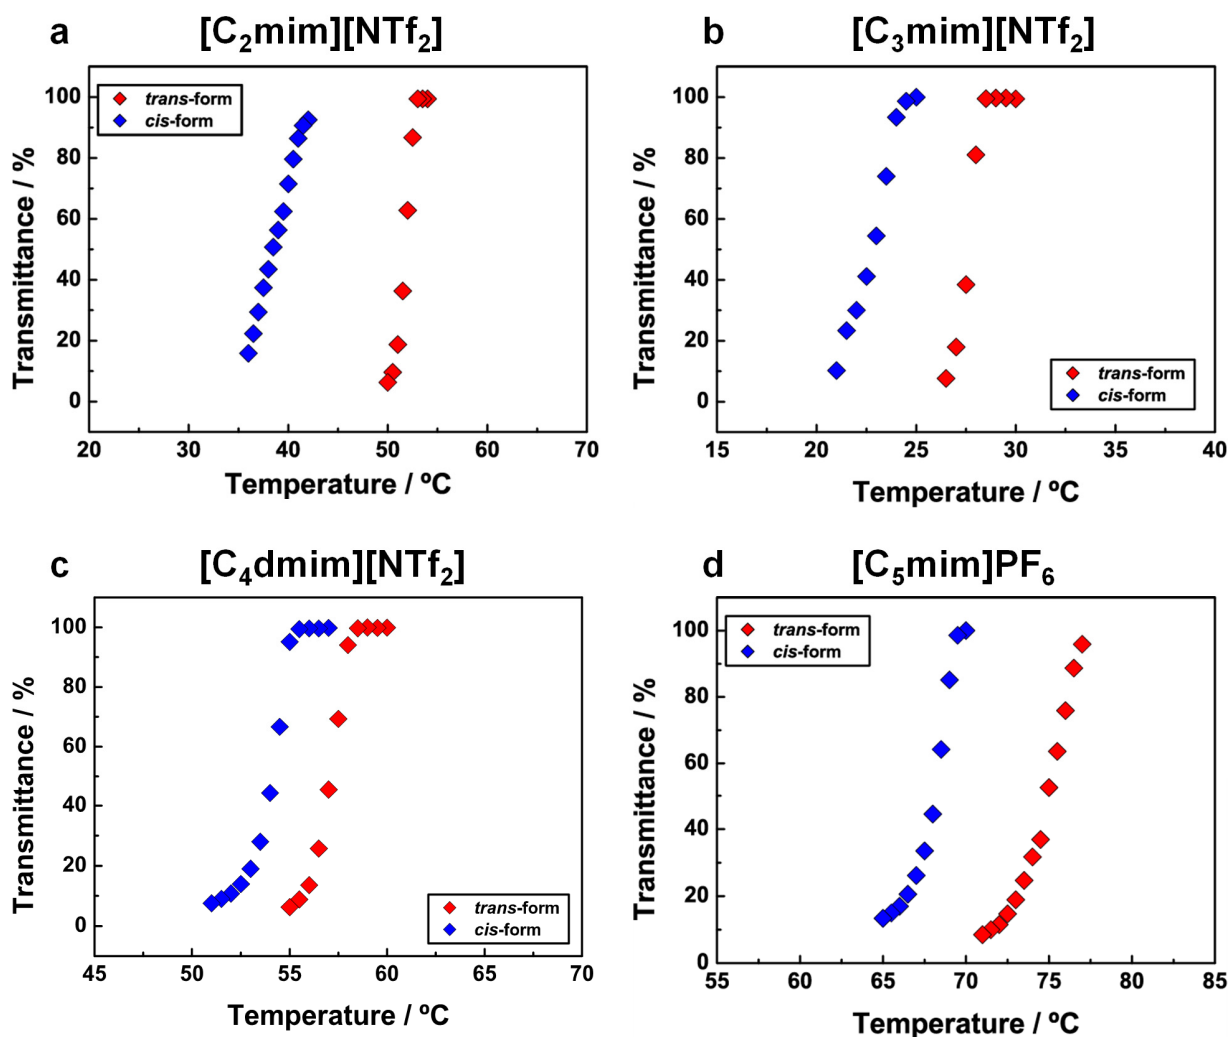

**Fig. S6** Temperature dependence of optical transmittance for 3 wt% P(AzoBnAm-*r*-NIPAm) random copolymer ( $[AzoBnAm]/[NIPAm] = 11:89$ ) in (a)  $[C_2mim][NTf_2]$ , (b) 1-methyl-3-propylimidazolium ( $[C_3mim]$ )  $[NTf_2]$ , (c) 1-butyl-2,3-dimethylimidazolium ( $[C_4dmim]$ )  $[NTf_2]$ , and (d) 1-methyl-3-pentylimidazolium ( $[C_5mim]$ )  $PF_6$  under UV light irradiation (*cis*-form) and in the dark (*trans*-form).



**Table S1** Cloud points ( $T_c$ s) for 3 wt% P(AzoBnAm-*r*-NIPAm) random copolymer ([AzoBnAm]/[NIPAm] = 11:89) in several imidazolium-based ILs under UV light irradiation or in the dark.

| IL                                       | $T_c(trans) / ^\circ\text{C}$ | $T_c(cis) / ^\circ\text{C}$ | $\Delta T_c / ^\circ\text{C}$ |
|------------------------------------------|-------------------------------|-----------------------------|-------------------------------|
| [C <sub>7</sub> mim][NTf <sub>2</sub> ]  | 53                            | 42                          | 11                            |
| [C <sub>3</sub> mim][NTf <sub>2</sub> ]  | 28                            | 24                          | 4                             |
| [C <sub>4</sub> dmim][NTf <sub>2</sub> ] | 58                            | 55                          | 3                             |
| [C <sub>5</sub> mim]PF <sub>6</sub>      | 77                            | 69                          | 8                             |

### Supporting References

- S1 T. Ueki, R. Usui, Y. Kitazawa, T. P. Lodge and M. Watanabe, *Macromolecules*, 2015, **48**, 5928–5933.
- S2 S. Imaizumi, H. Kokubo and M. Watanabe, *Macromolecules*, 2012, **45**, 401–409.
